# Supplementary material for: Dissociated Fear and Spatial Learning in Mice with Deficiency of Ataxin-2
Source: PLoS One. 2009 Jul 20;4(7):e6235. doi: 10.1371/journal.pone.0006235 (PMC2707006; doi:10.1371/journal.pone.0006235)
Supplement: Table S1 — Raw data of Fear conditioning tests for cohort A and B. Data of fear conditioning tests for cohort A and B. Atxn2 ko mice. wt, het and hom signify wild-type (+/+), heterozygous (+/−), and homozygous (−/−) mice respectively. PreCS and postCS refer to preconditioning and post conditioning stimulus, respectively. Note that some of the wt mice do not show freezing at baseline, but all of these do show substantially increased freezing after conditioning. (0.03 MB XLS) [file pone.0006235.s003.xls]

## Sheet: Sheet1
	Supplemental Table 1_Raw Data of fear conditioning tests for group A and B.
		Group A		Percent Freezing		Group B		Percent Freezing
		Genotype	Gender	pre-CS	postCS	Genotype	Gender	pre-CS	postCS
		wt	F	30	88.8889	wt	F	0	53.9
		wt	F	24.1667	54.4444	wt	F	4.17	93.4
		wt	F	1.66667	31.1111	wt	M	54.2	74.5
		wt	F	14.1667	70	wt	M	23.3	41.5
		wt	F	29.1667	70	wt	F	1.67	13.3
		wt	F	11.6667	72.2222	wt	M	25.8	79.1
		wt	F	36.6667	85.5556	wt	M	7.5	38.4
		wt	F	38.3333	90	het	F	44.2	14.5
		wt	F	12.5	74.4444	het	F	10	85.7
		wt	M	10.8333	64.4444	het	M	0.83	14.3
		wt	M	17.5	72.2222	het	F	1.67	42.5
		wt	M	5.83333	10	het	F	24	61.7
		wt	M	15.8333	52.2222	het	M	0	46.2
		wt	M	4.16667	22.2222	het	M	24.2	7.7
		wt	M	0	53.3333	het	F	7.5	90.1
		wt	M	35	5.55556	het	M	30	27.4
		wt	M	10	17.7778	Hom	F	2.5	4.4
		wt	M	1.66667	28.8889	Hom	M	3.33	11.1
		wt	F	25	64.4444	Hom	F	9.17	30.8
		wt	F	4.16667	42.2222	Hom	F	7.5	0
		wt	F	10.8333	24.4444	Hom	M	0	44.9
		wt	F	0	63.3333	Hom	M	0	0
		Hom	F	3.33333	8.88889	Hom	M	0	4.4
		Hom	F	0	0	Hom	M	6.67	2.2
		Hom	F	4.16667	48.8889	Hom	M	5.83	26.4
		Hom	M	0	2.22222
		Hom	M	0	0
		Hom	M	0	0
		Hom	M	0	0
		Hom	M	0	0
		Hom	M	0	0
		Hom	M	0	0
		Hom	F	4.16667	23.3333
		Hom	F	0	10
		Hom	F	34.1667	18.8889
		Hom	F	1.66667	0
		Hom	F	0	0
		Hom	F	0	13.3333
